# Supplementary material for: Embedding Mobile Health Technology into the Nurses' Health Study 3 to Study Behavioral Risk Factors for Cancer
Source: Oxford University Press journal article supplement (doi:10.1158/1055-9965.epi-19-1386), 2020-02-25

**Supplemental Table 1**

**Post-Sampling Questionnaire.** At the end of the four sampling periods, participants will be emailed a questionnaire asking about physical activity and sleep in the previous year.

Physical Activity and Sedentary Behavior


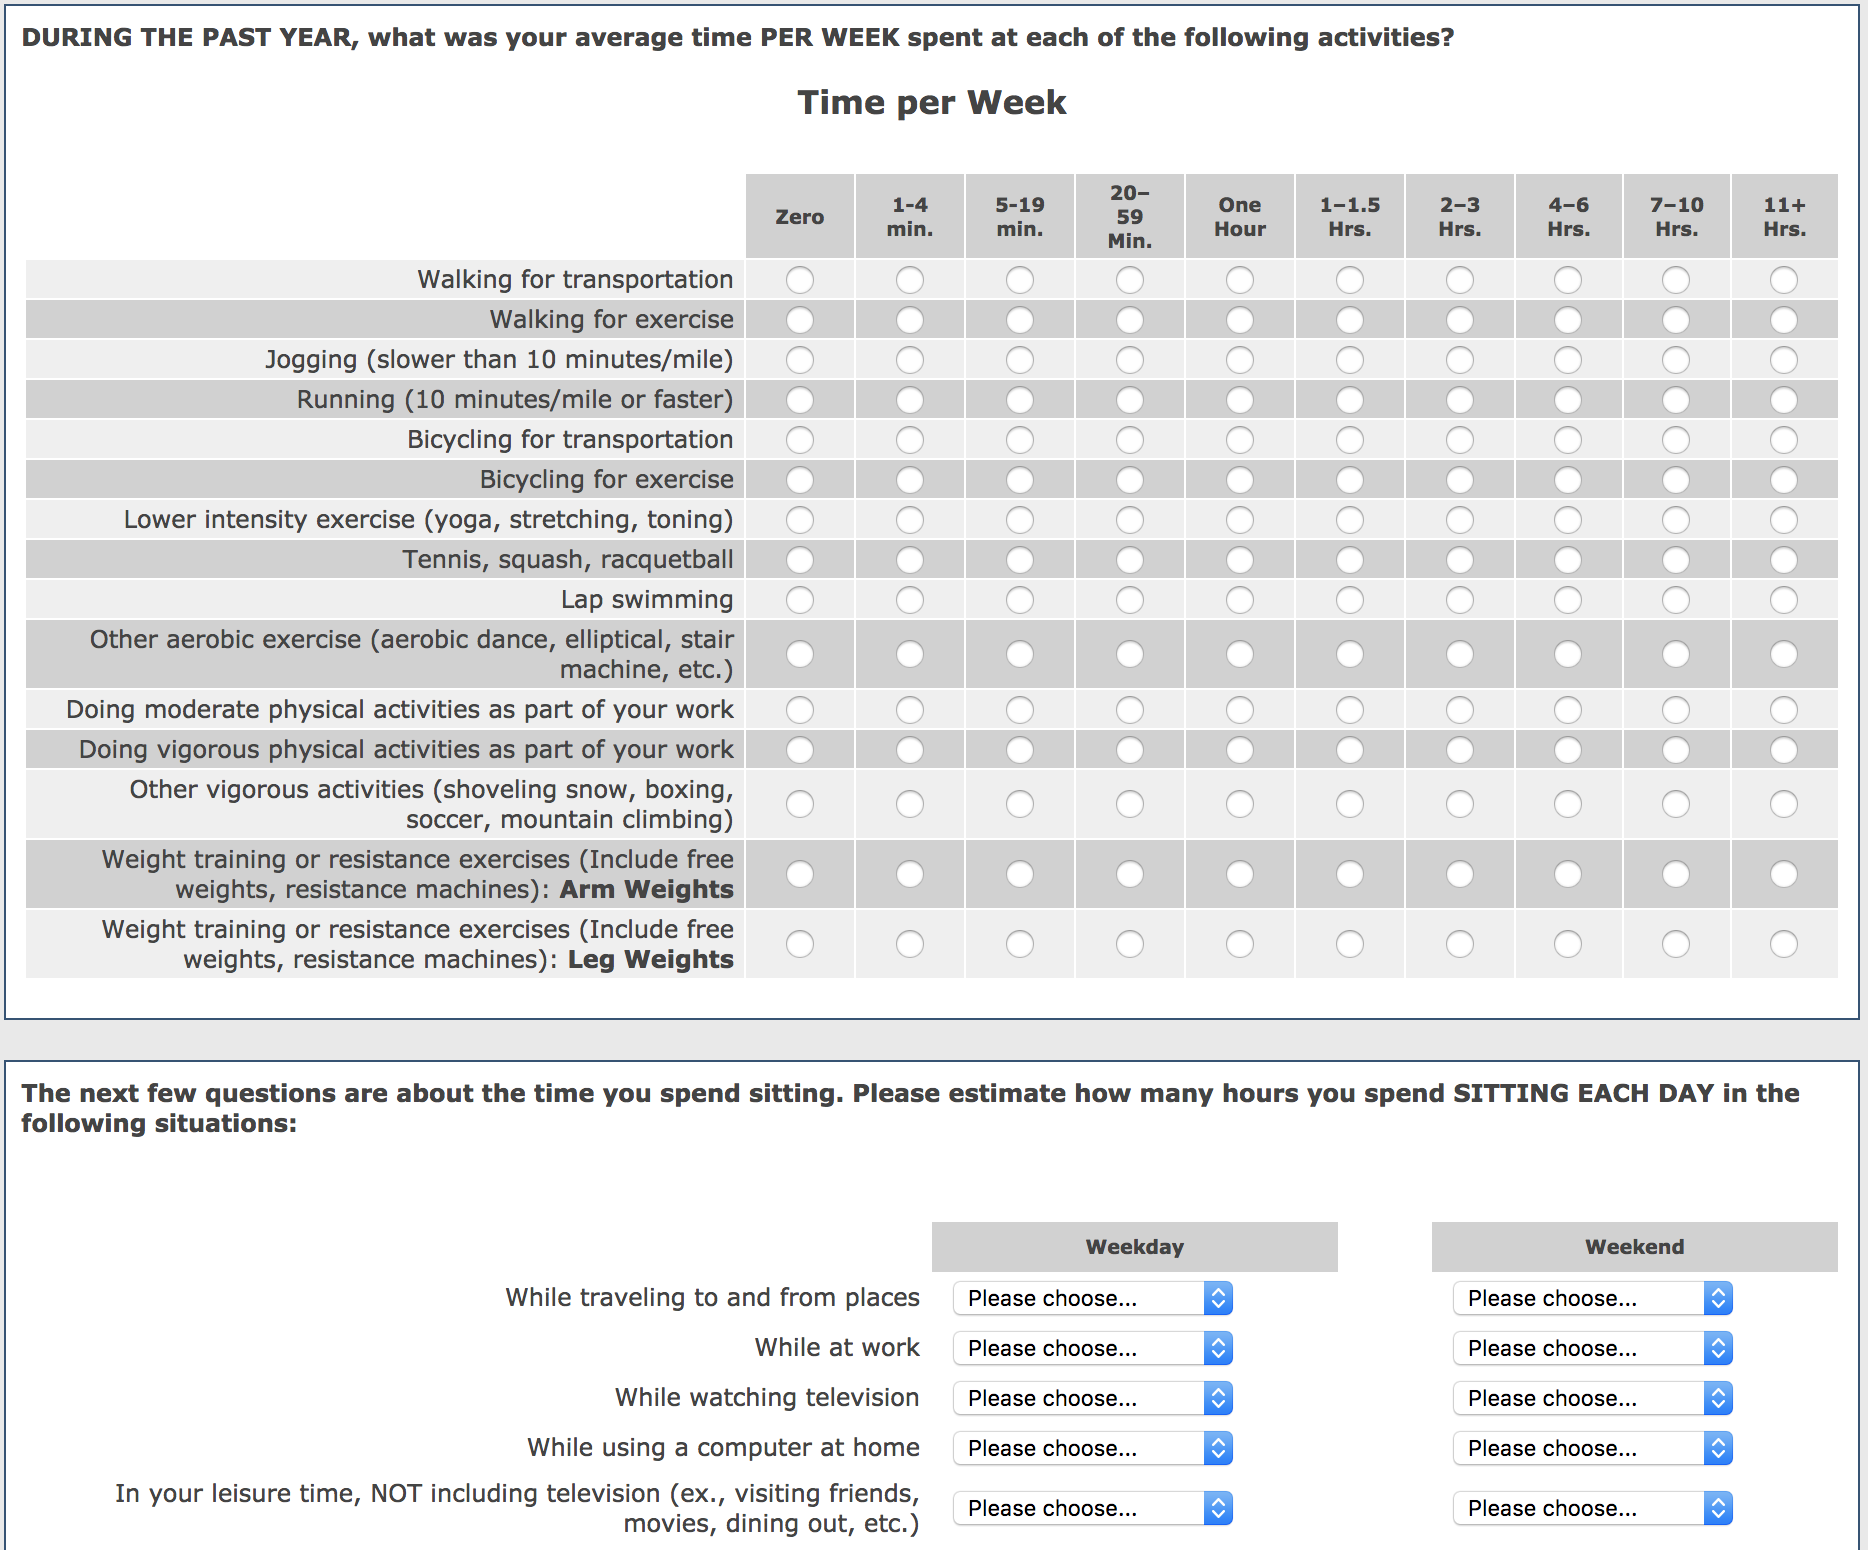


Categories for sitting responses:

| Less than 15 mins/  day | 15 mins/  day | 30 mins/  day | 1 hour/  day | 2 hours/day | 3 hours/day | 4 hours/day | 5 hours/day | 6 hours/day | 7 hours/day |
| --- | --- | --- | --- | --- | --- | --- | --- | --- | --- |

Sleep and Night Shift Work
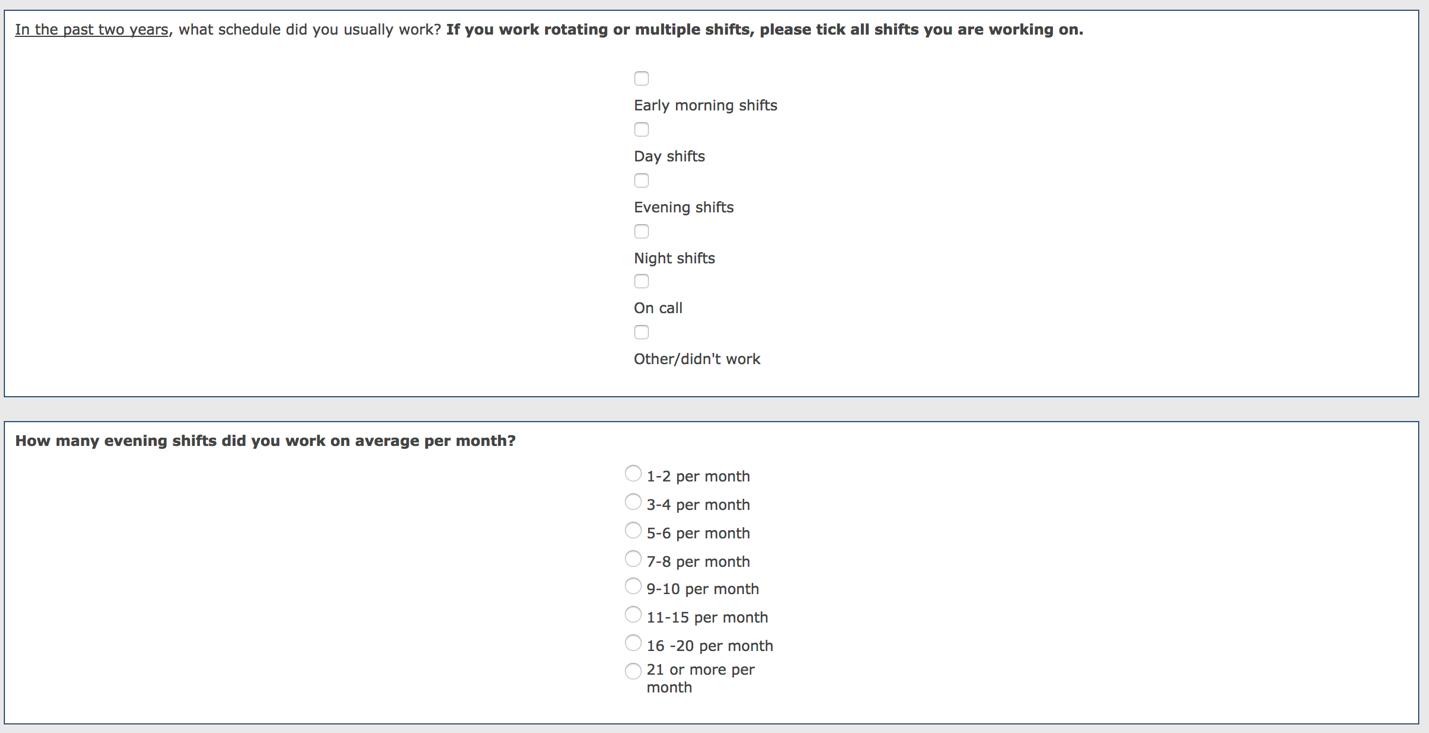


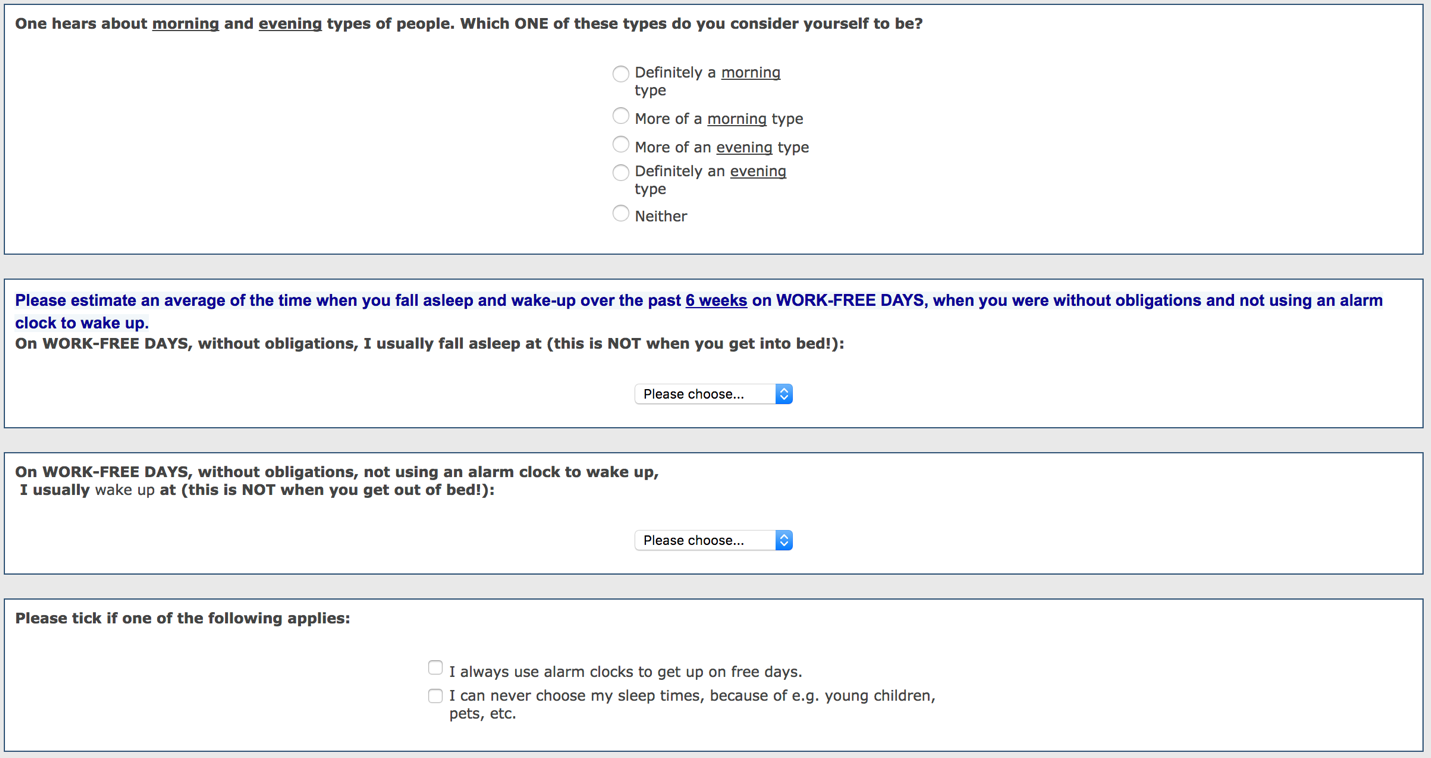


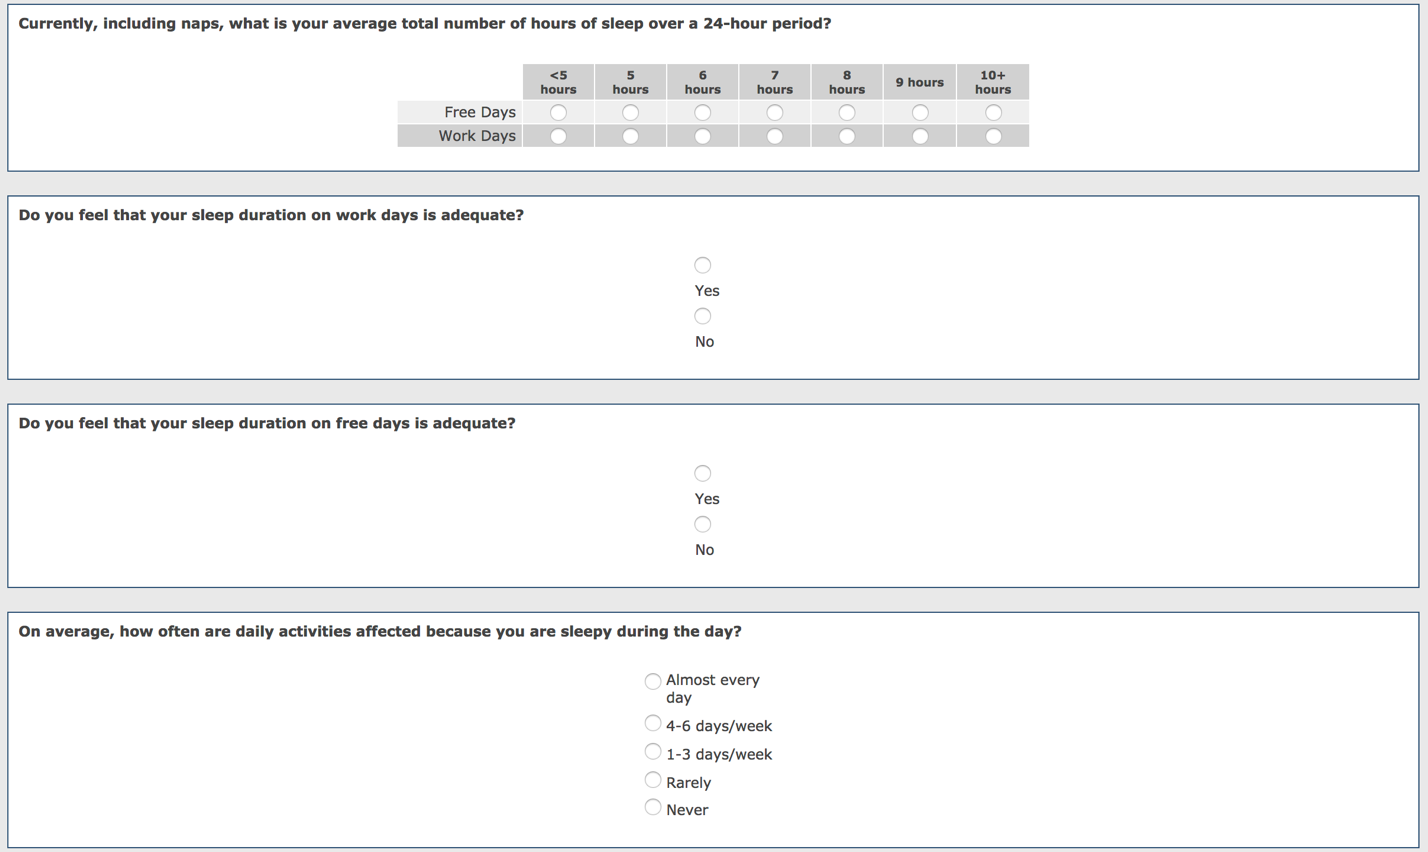


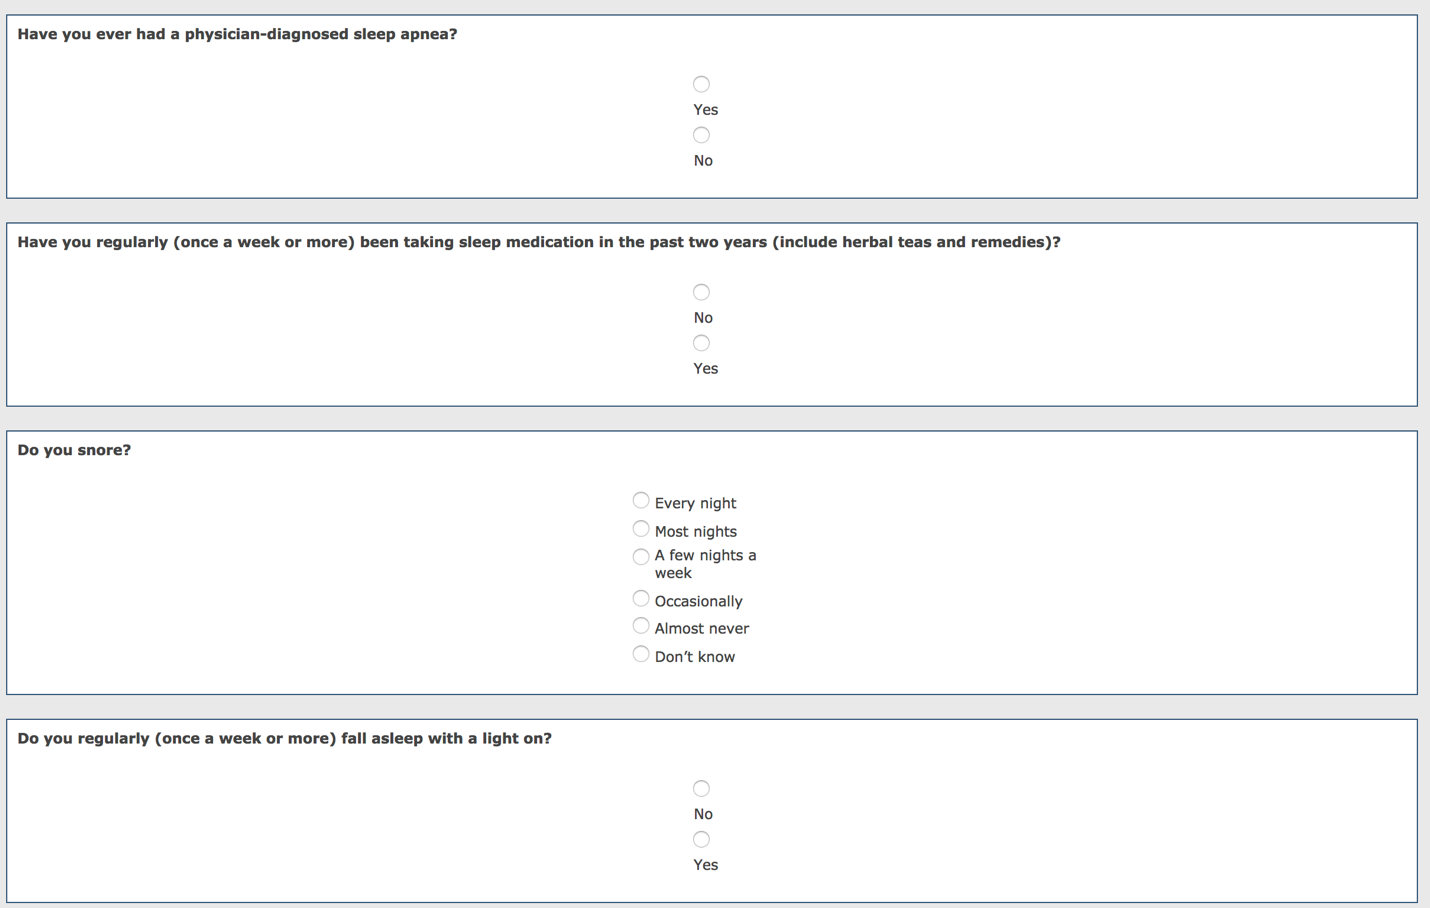


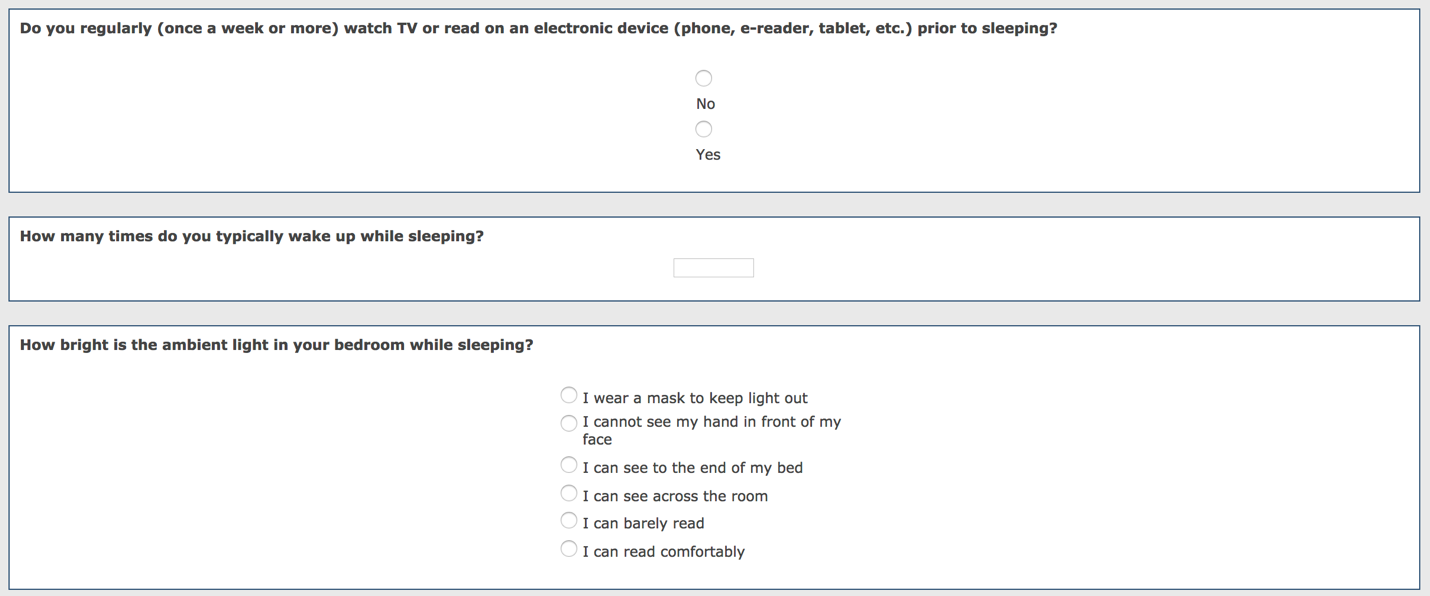

Supplement: 10559965epi191386-sup-232074_2_supp_6100136_q5v04t.docx [file 10559965epi191386-sup-232074_2_supp_6100136_q5v04t.docx]
